# Supplementary material for: Preclinical Studies of Granulysin-Based Anti-Tn Immunotoxins as A New Antitumoral Treatment
Source: Preprints.org preprint supplement (doi:10.20944/preprints202202.0268.v2), 2022-03-01
Supplement: Supplementary file 1 [file supplementary]

Supplementary **Table 1**

Table 1 MFI ratio in cells incubated with SM3GRNLY (left) and iSM3GRNLY (right) versus control cells.

| Cell line | SM3GRNLY | iSM3GRNLY |
| --- | --- | --- |
| JURKAT | 6,51 | 19,1 |
| PANC-1 | 4,32 | 8,19 |
| H929 | 4,23 | 8,23 |
| CAPAN-2 | 3,72 | 4,71 |
| A549 | 2,84 | 1,5 |
| MCF-7 | 2,58 |  |
| MDA-MB-231 | 1,02 | 1,27 |

Supplementary **Table 2**

Table 2 MFI ratio in cells incubated with iAR20.5GRNLY and AR20.5GRNLY versus control cells.

| Cell line | Ratio MFI |
| --- | --- |
| JURKAT | 13,32 |
| CAPAN-2 | 12,7 |
| H929 | 12,67 |
| MCF-7 | 11,84 |
| A549 | 4,85 |
| PANC-1 | 3,54 |
| MIA PACA-2 | 2,16 |
| MDA-MB-231 | 1,86 |

Supplementary Figures


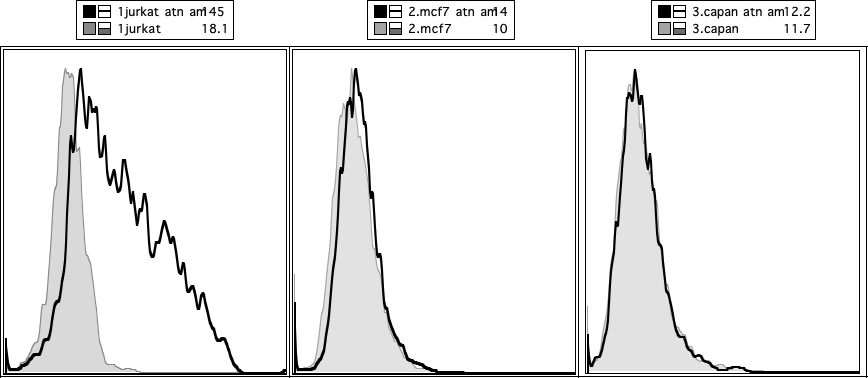

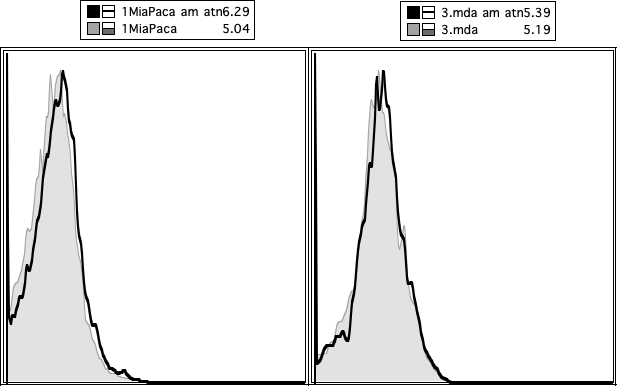


**Figure S1** Tn binding assay using Tn antigen monoclonal antibody (Tn218) Cat. No.MA1-90544 Thermo Fisher Scientific. At the top you can see the number the mean fluorescence intensity in each line. The assay was performed using the same procedure described for immunotoxins using a concentration of the aforementioned antibody at a 1: 100 dilution.

**Figure S2** Study of the induction of death in JURKAT cells. Cells were preincubated for 1 hour in the presence or absence of 100 µM Z-VAD-fmk, 30 μM NEC-1 or 1 µM NSA alone or in combination. Subsequently, it was incubated with 10 µM of iSM3GRNLY for 24 hours and analyzed by flow cytometry by labeling with 7-AAD combined with the analysis of cell size in FSC-H. Representative image from two independent trials.


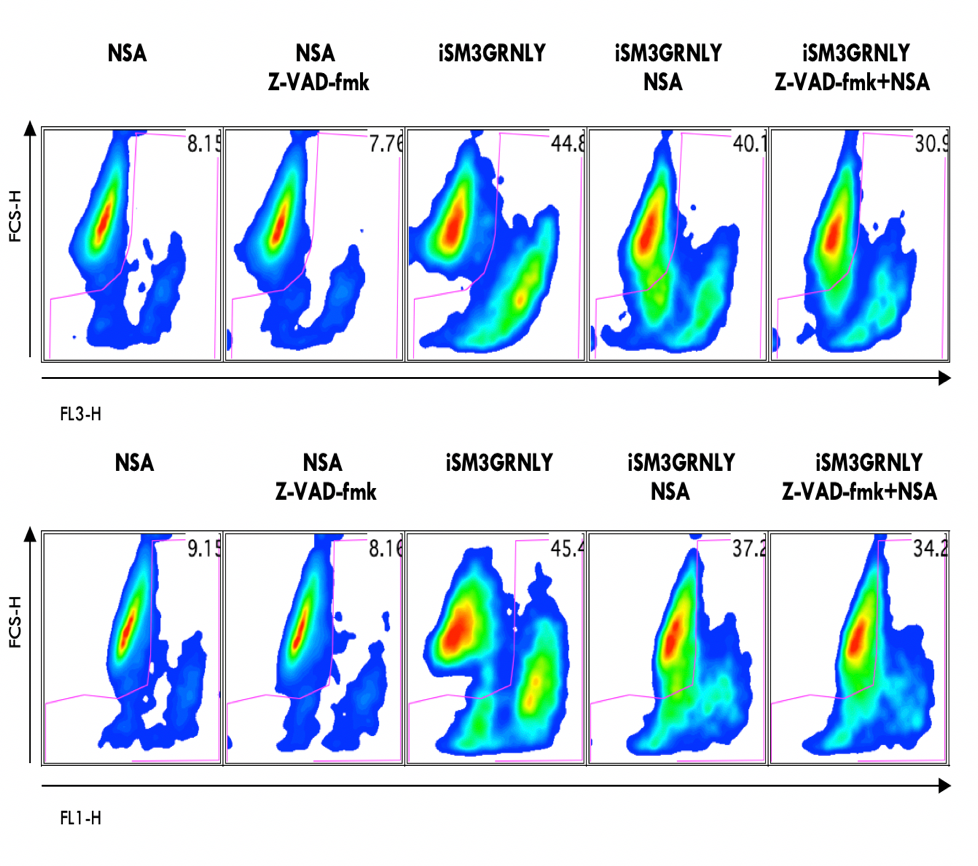

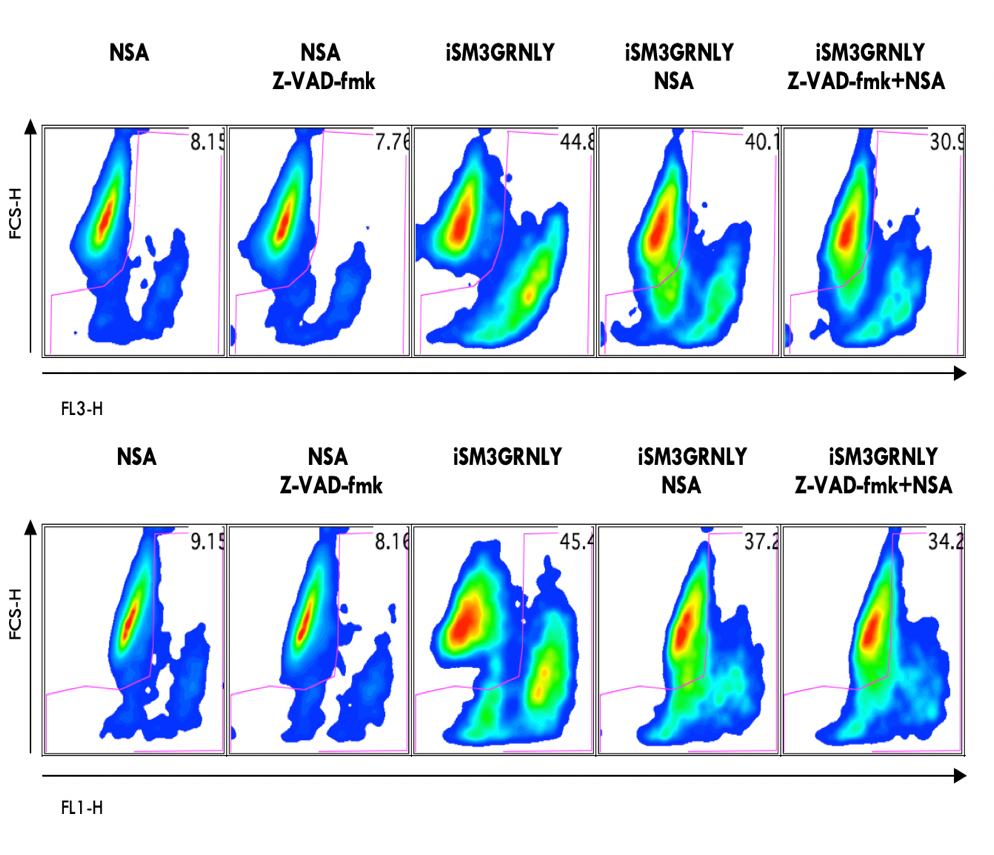

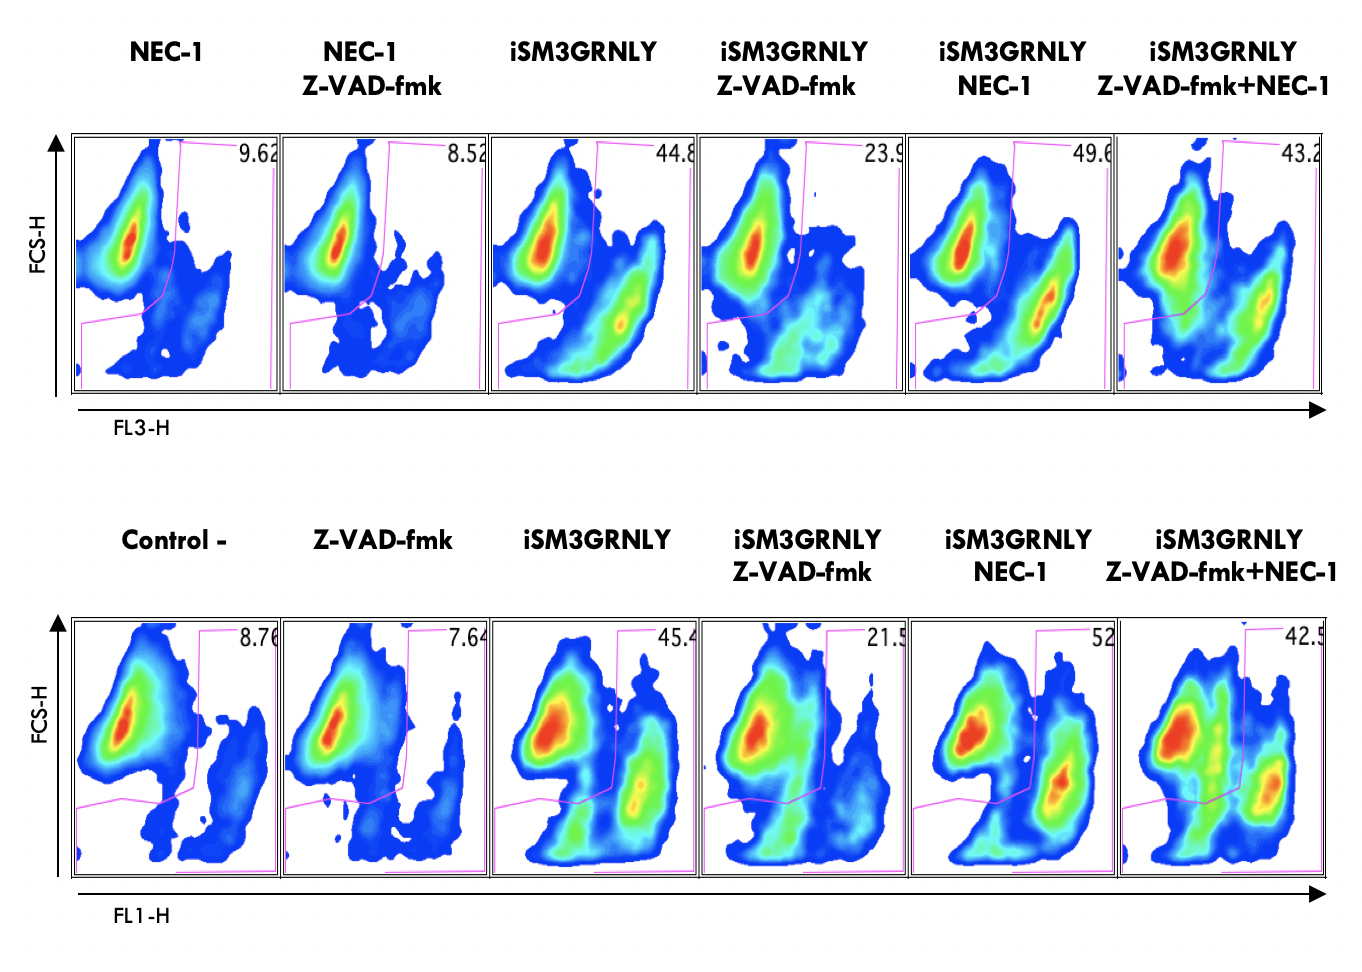

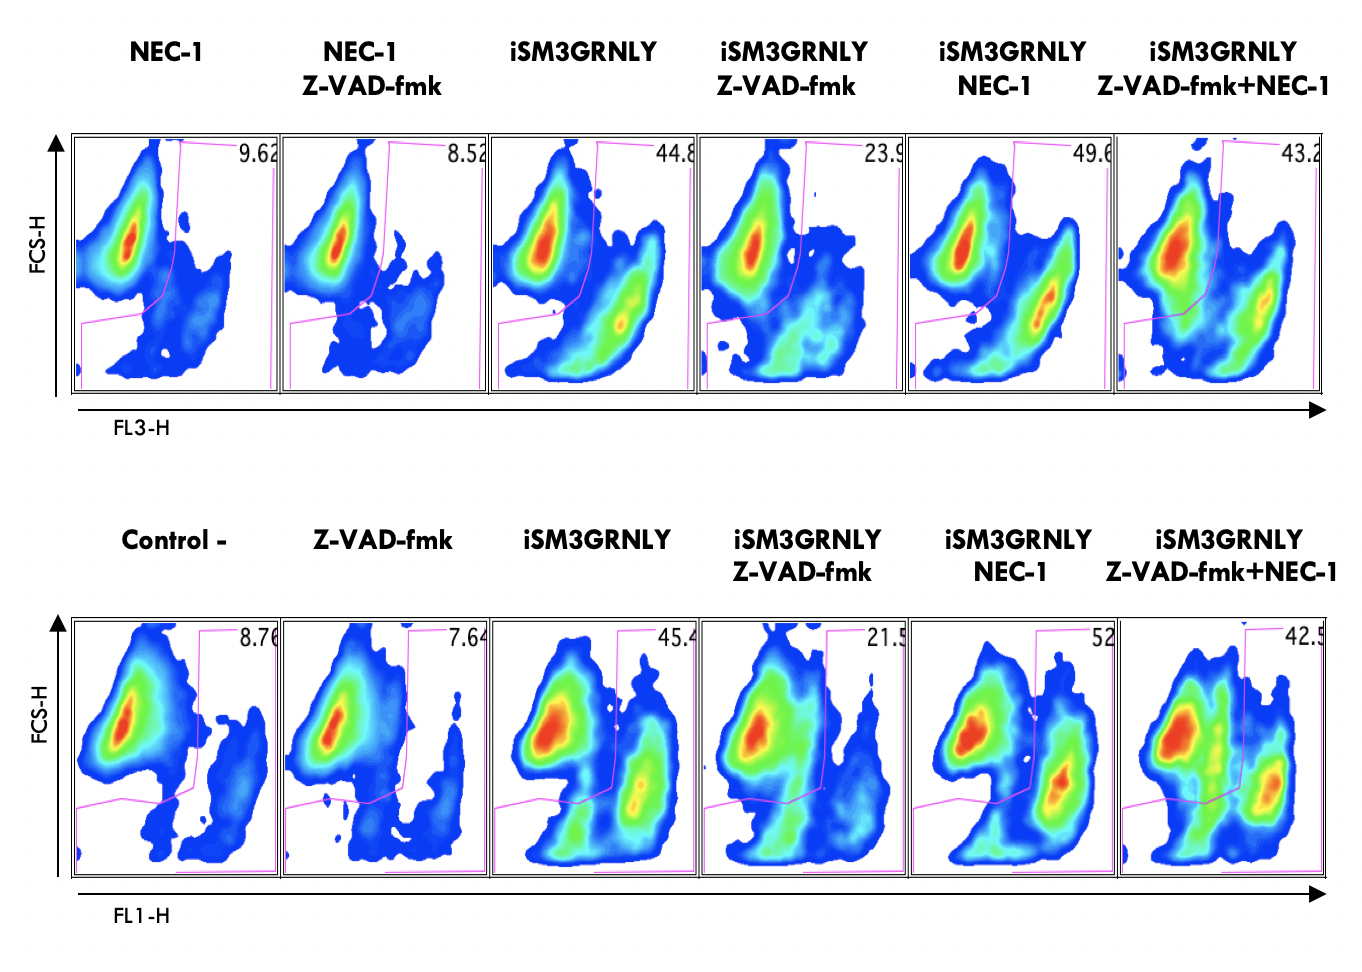

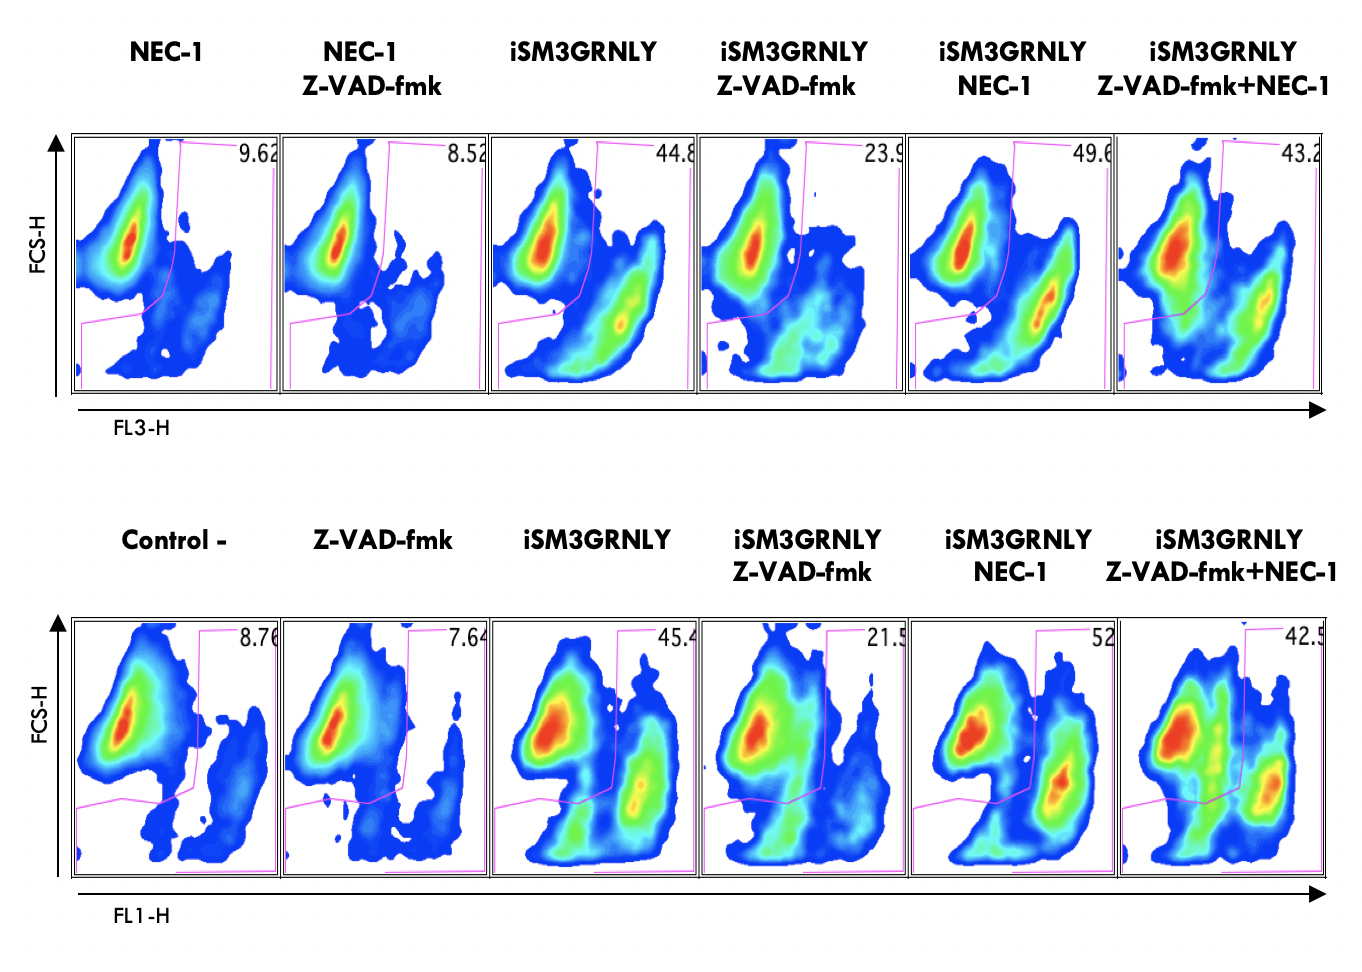

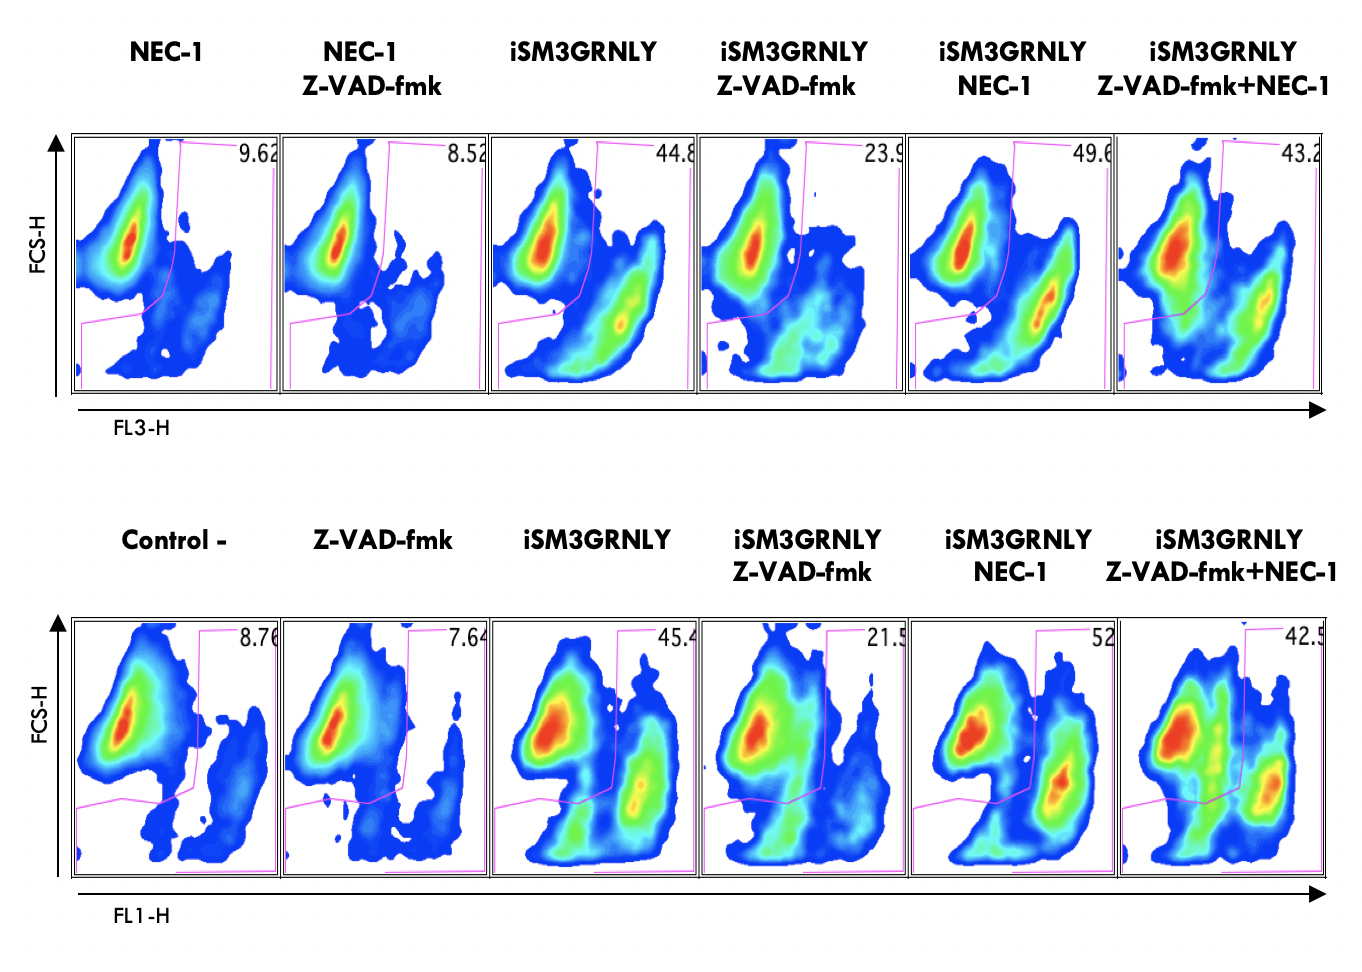


CONTROL

TREATED

FCS-H

FITC
